# Supplementary material for: The stability of Pd/TS-1 and Pd/silicalite-1 for catalytic oxidation of methane – understanding the role of titanium
Source: Royal Society of Chemistry journal article supplement (doi:10.1039/c9cy01579e), 2019-12-05
Supplement: c9cy01579e1.pdf [file c9cy01579e1.pdf]

## Supplementary Information

# The stability of Pd/TS-1 and Pd/Silicalite-1 for catalytic oxidation of methane - understanding the role of titanium

Hadi Hosseiniamoli <sup>a</sup>, Adi Setiawan <sup>b</sup>, Adesoji A. Adesina<sup>d</sup>, Eric M. Kennedy <sup>c</sup> and Michael Stockenhuber <sup>c\*</sup>

<sup>a</sup>Western Sydney University, Centre for Infrastructure Engineering, Sydney, 2747, Australia

<sup>b</sup>Mechanical Engineering Department, Universitas Malikussaleh, Lhokseumawe, 24352, Indonesia

<sup>c</sup>The University of Newcastle, Newcastle, 2308, Australia

<sup>d</sup> ATODATECH LLC, Brentwood, CA 94513, USA.

\*Corresponding author: Michael Stockenhuber (michael.stockenhuber@newcastle.edu.au)

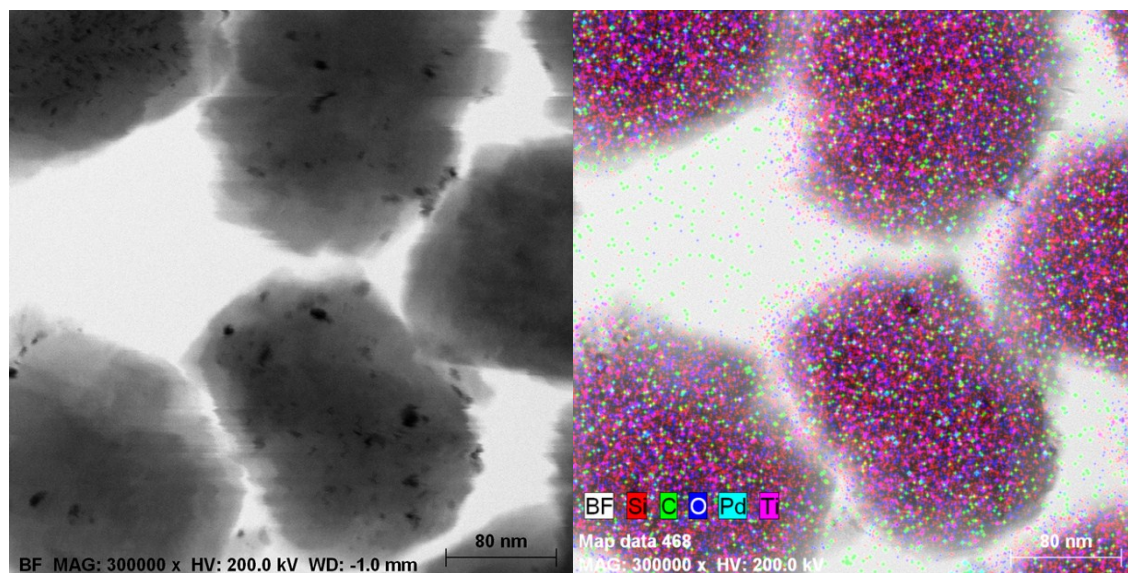

**Fig. S1.** TEM image and elemental mapping by EDS analysis of Pd/TS-1

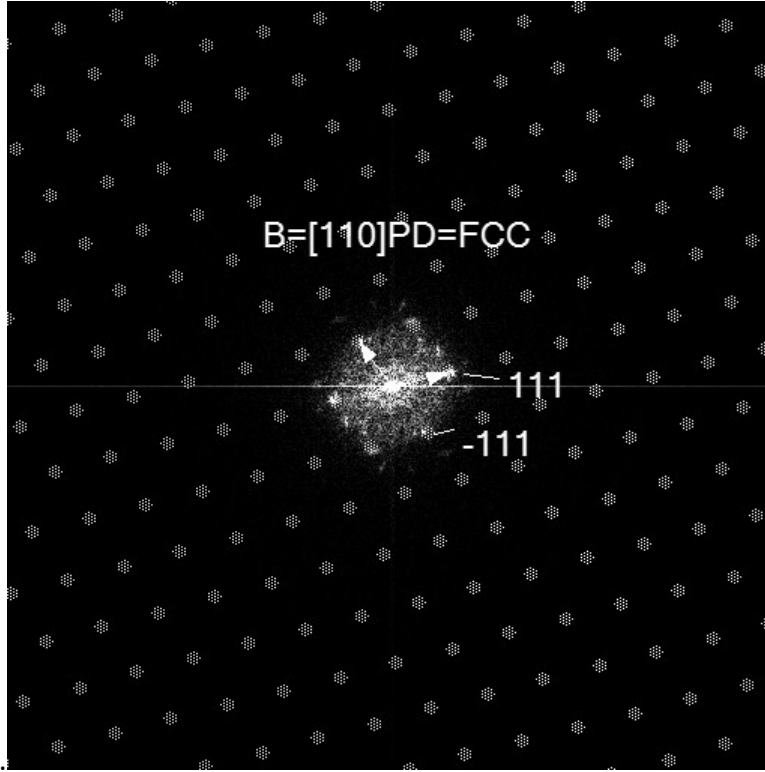

**Fig. S2.** The Indexed FFT pattern of PdO (111) facet plane on Pd/TS-1
